# Supplementary material for: Senktide blocks aberrant RTN3 interactome to retard memory decline and tau pathology in social isolated Alzheimer’s disease mice
Source: PubMed Central journal article supplement (PMC10984625; doi:10.1093/procel/pwad056), 2023-11-27

1  
2  
3  
4  
5  
6  
7  
8  
9  
10  
11  
12  
13  
14  
15  
16  
17  
18  
19  
20  
21  
22  
23  
24  
25  
26  
27  
28  
29  
30  
31  
32  
33  
34  
35  
36  
37  
38  
39  
40

**Supplementary Fig. 1. The behavioral changes in isolated AD mice and group housed AD mice at different ages.**

(A-C) The open field test was used to detect the anxious-like behavior in different groups. The total distance (A), velocity (B) and time in the center (C) were evaluated. (D, E) The elevated plus maze task was used to detect the anxious-like behavior in different groups. The time in the open arms (D) and the total entries to the open arm (E) were evaluated. (F, G) The latencies to reach the hidden platform in the learning stage (day1-day 7) of Morris Water Maze in group-housed and socially isolated WT (F) and AD (G) mice. (H-J) Latency to the platform region at day 9 (H) the total crossing numbers in the platform region at day 9 (I) and the total time spent in the target quadrant at day 9 (J) of Morris water maze in different groups. (K-M) The percent of freezing time at day 3 (acquisition stage, K) and day 5 (generalization stage, L and M) of pattern separation task. (N, O) The percent of freezing time in context C at day 3 (N) and the percent of freezing time in context C and D at day 5 (O) in one-month group-housing mice. All results are mean  $\pm$  SEM.

**Supplementary Fig. 2. The alterations of adult neurogenesis in the DG region of different groups**

(A) The representative images of doublecortin (DCX, white) and nucleus (DAPI, blue) in different groups. (B) The quantitative analysis for the DCX positive cells in the DG of different groups. \*\*  $p < 0.01$ , versus group-housed AD mice. All results are mean  $\pm$  SEM.

41

42

43 **Supplementary Fig. 3. The alterations of DG-CA3 circuit in the different groups**

44 (A) Experimental protocol for MFBs analysis. Mice were injected with human  
45 Synapsin I promoter-driven AAV2/8-EGFP viruses. After 4 weeks, mice were  
46 housed in isolation (1 day, 7 days or 14 days) or in group of 4 mice.

47 (B, C) The normalized density of the surface area (B) and volume (C) of MFBs  
48 (surface area or volume of single MFB/thickness of ROI) in the different groups. The  
49 values of the surface area and the volume were list in the bottom of curve by different  
50 colors as indicated.

51 (D, E) The quantitative analysis for normalized surface area (D) and volume (E) of  
52 MFBs in the different groups.

53 (F, G) The cumulative curves for normalized surface area (F) and volume (G) of  
54 MFBs after arranging the surface area or volume from large to small in the different  
55 groups. The dash lines in different colors indicated the percentage of the number of  
56 MFBs when the cumulative surface area or volume reaches to 80% of total surface  
57 area or volume.

58 (H, I) The quantitative analysis for the percentage of the number of MFBs indicated  
59 in (F) and (G). \*\*  $p < 0.01$ , \*\*\*  $p < 0.001$ , \*\*\*\*  $p < 0.0001$ .

60 (J) The average amplitude of Mf mEPSCs in different groups.

61 (K, L) The average frequency (K) and amplitude (L) of mEPSCs (<45 pA) in  
62 different groups. \*  $p < 0.05$ .

63 (M, N) The Golgi staining for the dendritic spines in the CA3 pyramidal neurons. (M)  
64 The representative images for spines. (N) The quantification of mushroom spine  
65 density. \*\*\*\*  $p < 0.0001$ .

66 All results are mean  $\pm$  SEM.

67

68

69

70 **Supplementary Fig. 4. Overexpressing of miR-218 and miR-124 can rescues**

71 **mEPSC frequencies impaired by social isolation**

72 (A) The RNA quality was validated by the PCR for 28S and 18S RNA. M, RNA  
73 marker.

74 (B, C) The relative expression levels of miR-218 (B) and miR-124 (C) in  
75 group-housed or isolated WT and AD mice. \*  $p < 0.05$ , \*\*\*  $p < 0.001$ .

76 (D) The relative expression levels of miR-218 and miR-124 in group-housed or  
77 isolated AD mice co-treated by miR-218 agomirs and miR-124 agomirs. \*\*\*\*  $p <$   
78 0.0001.

79 (E) The representative mEPSC traces in the different groups.

80 (F) The amplitude of mEPSC in different groups. \*\*\*\*  $p < 0.0001$ .

81 (G) The frequency of mEPSC in different groups. \*\*\*\*  $p < 0.0001$ .

82 (H) The representative mEPSC traces and the illustration for the MF based synaptic  
83 current. \*\*\*\* $p < 0.0001$ .

84 (I, J) The representative images of doublecortin (DCX, green) and nucleus (DAPI,  
85 blue) in different groups (I) and the quantitative analysis (J) for the DCX positive  
86 cells in the DG of isolated AD mice co-treated by miR-dDiAs agomirs. \*\*  $p < 0.01$ ,  
87 versus scramble treated isolated AD mice.

88 (K) The expression profiles of precursors for the miR-dDiAs in the DG of in 7-day  
89 socially isolated (SI) and group-housed (GH) WT and AD mice. \*\* $p < 0.01$ , \*\*\* $p <$   
90  $0.001$ , \*\*\*\* $p < 0.0001$ .

91 (L, M) The enhancer regions of miR-dDiAs as indicated by the H3K27ac, H3K4me1  
92 and H3K4me3 peaks.

93

94

95

### 96 **Supplementary Fig. 5. miR-dDiAs regulate the expression of Rtn3**

97 (A) The protein level of RTN3 was analyzed by western blot. The representative blots  
98 (upper) and the quantitative analysis. \* $p < 0.05$ , \*\*\* $p < 0.001$ .

99 (B) The potential miRNAs binding sites in 3'UTR of *Rtn3* (upper) and the detailed  
100 sequence of wild type and mutant 3'UTR of *Rtn3* containing the binding sites of  
101 miR-218 and miR-124.

102 (C) The luciferase experiments were used to evaluate the direct binding of miR-218  
103 and miR-124 with the 3'UTR of *Rtn3*. \* $p < 0.05$ , vs scramble treated.

104 (D, E) The protein level of RTN3 for Figure 4I in the cells treated with miR-218 and  
105 miR-124 antagomirs (D) or with miR-218 and miR-124 mimics (E). \* $p < 0.05$ , \*\*\* $p <$   
106  $0.001$ .

107 (F) The relative expression levels of miR-218, miR-124 and *Rtn3* mRNA upon the  
108 treatment of miR-218 antagomirs, miR-124 antagomirs and scrambled control. \*\*\* $p <$   
109  $0.001$ , concentration of treatment of antagomir: miR-218, 200 nM; miR-124, 100nM.  
110 \*\*\*\* $p < 0.0001$ .

111 (G) The relative expression levels of miR-218, miR-124 and *Rtn3* mRNA upon the  
112 treatment of miR-218 mimics, miR-124 mimics and scrambled control. concentration  
113 of treatment of mimics: miR-218, 200 nM; miR-124, 100nM. \*\*\*\* $p < 0.0001$ .

114

115 All results are mean  $\pm$  SEM.

116

117

118

### 119 **Supplementary Fig. 6. Knockdown of RTN3 in isolated *Rtn3*<sup>fllox/+</sup> -AD mice** 120 **rescues impaired mEPSCs**

121 (A) Upper: Schematic diagram of the *Rtn3*<sup>fllox/fllox</sup> allele and the allele cut by  
122 Cre-mediated recombination. Lower: The representative genotyping blots for

123 *Rtn3*<sup>flox/flox</sup> mice. WT: wild type mice; f/f: *Rtn3*<sup>flox/flox</sup> mice; f/+ : *Rtn3*<sup>flox/+</sup> mice; Neg:  
124 negative control; M: marker.  
125 (B, C) The images of body size in different mouse strains (B) and quantification  
126 analysis of body weight (C).  
127 (D, E) The representative images of the whole brain in different mouse strains (D) and  
128 quantification analysis of brain weight (E).  
129 (F-H) The mRNA (F) and protein (G, H) level of the RTN3 in the hippocampus of  
130 different mouse strains. \*  $p < 0.05$ , \*\*  $p < 0.01$ , \*\*\*  $p < 0.001$ , \*\*\*\*  $p < 0.0001$ .  
131 (I) The representative mEPSC traces in the different groups.  
132 (J) The frequency of mEPSC in different groups. \*\*\*\*  $p < 0.0001$ .  
133 (K) The amplitude of mEPSC in different groups. \*\*\*\*  $p < 0.0001$ .  
134 (L) The representative mEPSC traces and the illustration for the MF based synaptic  
135 current. \*\*\*\*  $p < 0.0001$ .  
136 (M) The representative images of doublecortin (DCX, green) and nucleus (DAPI,  
137 blue) and the quantitative analysis for the DCX positive cells in the DG of isolated  
138 *Rtn3* cKO AD mice.  
139  
140 All results are mean  $\pm$  SEM.  
141  
142

143 **Supplementary Fig. 7. Upregulation of RTN3 induced by miR-dDiAs decoy was**  
144 **rescues by *Rtn3* shRNA.**

145 (A) Schematic representation of the miR decoy. Ten miR-218 and five miR-124 target  
146 sequences were inserted into the 3' UTR of a GFP reporter gene driven by human  
147 synapsin 1 promoter. Poly(A), polyadenylation tail. Dashes indicate that there is no  
148 nucleotide at that position in the sequence.  
149 (B) The diagram for the virus injection in WT mice and the representative fluorescent  
150 image.  
151 (C-E) The level of miRNAs and *Rtn3* mRNA (C) and protein (D, E) level of the  
152 RTN3 in the hippocampus. \*  $p < 0.05$ , \*\*\*  $p < 0.001$ , \*\*\*\*  $p < 0.0001$ .  
153 (F, G) The percent of freezing time at day 3 (acquisition stage, F) and day 5  
154 (generalization stage, G) of pattern separation task.  
155  
156  
157

158 **Supplementary Fig. 8. RTN3 binds with mitochondria associated proteins,**  
159 **vesicle associated proteins and PP2A B subunits.**

160 (A) The DG region of hippocampus from 7-day socially isolated and group-housed  
161 AD mice was co-immunoprecipitated by RTN3 antibody and subjected to SDS-PAGE  
162 gels followed by Coomassie blue staining analysis. Three bands were selected for

163 further analysis by mass spectrometry.  
164 **(B-E)** Identification of RTN3 binding protein RAB3B (B), SLC25A46 (C), DNMI1L  
165 (D) and SYNGR1 (E) by mass spectrometry. aa: amino acid.  
166 **(F)** The GO analysis for the proteins that enriched in RTN3 interactome of social  
167 isolated mice (fold change  $\geq 1.5$ ) by mass spectrum. The color of dots indicates the  
168 different adjust  $p$  value and the size of dots indicates the different numbers of  
169 identified proteins.  
170 **(G)** The gene set enrichment analysis for the proteins that enriched in RTN3  
171 interactome of social isolated mice (fold change  $\geq 1.5$ ) by Cytoscape. The size of dots  
172 indicates the number of gene size.

173  
174

175 **Supplementary Fig. 9. RTN3 induced hyperphosphorylation of Tau through**  
176 **binding with PP2A B subunits, but did not affect the phosphorylation of**  
177 **GSK-3 $\beta$ .**

178 **(A)** PPP2R5A co-immunoprecipitated with PPP2CA and Tau5 in hippocampus.  
179 **(B)** PPP2R2C co-immunoprecipitated with PPP2CA and Tau5 in hippocampus.  
180 **(C)** PPP2R5E co-immunoprecipitated with PPP2CA and Tau5 in hippocampus.  
181 **(D)** PP2A activity assay. \*\*\*\*  $p < 0.0001$ .  
182 **(E)** Quantification analysis of the phosphorylation of tau at Ser396 (pSer396) for  
183 Figure 5N. \* $p < 0.05$ .  
184 **(F)** Analysis of the phosphorylation of tau at Thr231 (pT231), Ser262 (pS262),  
185 Ser202 and Thr205 (AT8) in cells transfected with P301L-GFP and *Rtn3*.  
186 **(G, H)** The protein level of GSK3 $\beta$  and the phosphorylation of GSK3 $\beta$  at Ser9 was  
187 analyzed by western blot. The representative blots (g) and the quantitative analysis  
188 (h).  
189 **(I)** Quantification analysis of His for Figure 5P. \*\* $p < 0.01$ .

190  
191  
192  
193  
194  
195

196 **Supplementary Fig. 10. Senktide disrupts the binding between RTN3 and its**  
197 **partners.**

198 **(A)** The wide-type and mutated *Rtn3* mRNA and protein sequence used to analyze the  
199 key amino acids that is required for binding to RTN3 partners. *Rtn3* WT: *Rtn3* wild  
200 type, *Rtn3* Mut: the indicated amino acids of RTN3 were mutated to alanine (A) or  
201 leucine (L).

202 (B-E) The HEK293 cells were transfected with pcDNA3.1(+)-*Rtn3*-WT-His or  
203 pcDNA3.1(+)-*Rtn3*-Mut-His plus pcDNA3.1(+)-*Rab3b*-Flag (B),  
204 pcDNA3.1(+)-*Syng1*-Flag (C), pcDNA3.1(+)-*Dnm1l*-Flag (D),  
205 pcDNA3.1(+)-*Slc25a46*-Flag (E) plasmids, separately. After 48 hours, the cell lysis  
206 was collected and 5% volume of cell lysates were used for input, half volume of the  
207 remaining cell lysis was coimmunoprecipitated with anti-IgG or anti-His separately  
208 and then subjected to the western blot by using anti-Flag.

209 (F-I) Hydrogen bond donor/acceptor of binding site in RTN3 with Carbetocin (blue,  
210 F), Glycerol Phenylbutyrate (blue, G), Saralasin (blue, H), Aripiprazole Lauroxil (blue,  
211 I). RTN3 is labeled with green while the amino acids interacting with indicated drugs  
212 were labeled with magenta. The green dotted lines indicated hydrogen bond between  
213 the compound and RTN3.

214 (J-M) The HEK293 cells were transfected with pcDNA3.1(+)-*Rtn3*-His plus the  
215 pcDNA3.1(+)-*Rab3b*-Flag (J), pcDNA3.1(+)-*Dnm1l*-Flag (K),  
216 pcDNA3.1(+)-*Slc25a46*-Flag (L) and pcDNA3.1(+)-*Syng1*-Flag (M) plasmids and  
217 then treated with the indicated drugs for 48 hours. Then, the cell lysis was collected  
218 and immunoprecipitated with anti-His and then subjected to the western blot by using  
219 anti-Flag.

220 (N) Scheme for treatment of social isolated AD mice with senktide. Senktide was  
221 administrated to the 2 months isolated AD mice during the 7 days isolation with the  
222 dose of 0.4mg/kg by *s.c.* injection every day.

223  
224  
225  
226  
227  
228  
229  
230  
231  
232  
233  
234  
235  
236  
237  
238

239 **Supplementary Fig. 11. Senktide inhibits the binding between Rtn3 and its**  
240 **partners in vivo.**

241 (A, B) Rtn3 co-immunoprecipitated with PPP2R2C, PPP2R5A and PPP2R5E in  
242 hippocampus.

243 (C, D) PPP2R5A co-immunoprecipitated with PPP2CA and Tau5 in hippocampus.

244 (E, F) PPP2R2C co-immunoprecipitated with PPP2CA and Tau5 in hippocampus.  
 245 (G, H) PPP2R5E co-immunoprecipitated with PPP2CA and Tau5 in hippocampus.  
 246 (I, J) RTN3 co-immunoprecipitated with DNMI1L, RAB3B, SLC25A46 and  
 247 SYNGR1 in hippocampus.  
 248 (K) The immunofluorescence of pS396 in the stratum lucidum of CA3 region.

249  
 250  
 251  
 252  
 253  
 254

255 **Supplementary Table 1 patient information**

| Number | Age | Sex | Final diagnosis        |
|--------|-----|-----|------------------------|
| 1      | 85  | M   | Multiple organ failure |
| 2      | 90  | M   | Liver cancer           |
| 3      | 84  | M   | Respiratory failure    |
| 4      | 84  | M   | Multiple organ failure |
| 5      | 87  | M   | Multiple organ failure |
| 6      | 85  | M   | AD                     |
| 7      | 88  | M   | AD                     |
| 8      | 95  | M   | AD                     |
| 9      | 81  | M   | AD                     |

256  
 257

258 **Supplementary Table 2 list of top 40 DG enriched miRNAs**

| miRNA name   | Ct value |
|--------------|----------|
| mmu-miR-194  | 26.90    |
| mmu-miR-187  | 27.74    |
| mmu-miR-27a  | 27.28    |
| mmu-miR-27b  | 27.39    |
| mmu-let-7a   | 21.80    |
| mmu-let-7d   | 26.43    |
| mmu-miR-128  | 29.13    |
| mmu-let-7c   | 22.96    |
| mmu-miR-99b  | 18.22    |
| mmu-miR-361  | 24.52    |
| mmu-miR-151  | 24.92    |
| mmu-miR-181a | 19.83    |
| mmu-miR-132  | 25.93    |
| mmu-miR-127  | 26.97    |
| mmu-miR-26a  | 23.94    |
| mmu-miR-191  | 17.48    |
| mmu-miR-125a | 26.18    |
| mmu-miR-125b | 23.29    |

|             |       |
|-------------|-------|
| mmu-miR-24  | 23.70 |
| mmu-let-7b  | 16.54 |
| mmu-miR-342 | 22.47 |
| mmu-let-7e  | 25.93 |
| mmu-miR-103 | 23.38 |
| mmu-miR-221 | 21.92 |
| mmu-miR-222 | 19.64 |
| mmu-miR-107 | 30.92 |
| mmu-miR-139 | 21.82 |
| mmu-miR-23a | 25.01 |
| mmu-miR-23b | 29.41 |
| mmu-miR-16  | 25.11 |
| mmu-miR-138 | 21.89 |
| mmu-miR-15b | 26.76 |
| mmu-miR-29a | 19.13 |
| mmu-miR-335 | 24.01 |
| mmu-miR-539 | 28.44 |
| mmu-miR-15a | 28.52 |
| mmu-miR-185 | 26.34 |
| mmu-miR-210 | 26.25 |
| mmu-miR-124 | 30.46 |
| mmu-miR-218 | 18.78 |

259

260

261

**Supplementary Table 7. The predicted compounds that docked to the Rtn3 pocket**

| zinc_id          | Libdock score | Molecule Names     | Cat NO.  |
|------------------|---------------|--------------------|----------|
| ZINC000150340074 | 236.347       |                    |          |
| ZINC000095615286 | 222.768       | Senktide           | HY-P0187 |
| ZINC000195761836 | 219.775       |                    |          |
| ZINC000169289386 | 216.689       | Saralasin          | HY-P0205 |
| ZINC000169368439 | 214.577       |                    |          |
| ZINC000150340074 | 212.726       |                    |          |
| ZINC000261106254 | 210.867       |                    |          |
| ZINC000169368439 | 209.293       |                    |          |
| ZINC000095617677 | 208.834       |                    |          |
| ZINC000169368439 | 208.506       |                    |          |
| ZINC000072131413 | 208.409       | hydroxy ritonavir  |          |
| ZINC000261106252 | 206.951       |                    |          |
| ZINC000095615286 | 206.59        | Senktide           | HY-P0187 |
| ZINC000095615286 | 204.971       |                    |          |
| ZINC000410428644 | 204.527       |                    |          |
| ZINC000169368439 | 203.397       |                    |          |
| ZINC000150338506 | 201.065       | inositol niacinate |          |
| ZINC000169289386 | 200.677       | Saralasin          | HY-P0205 |



|                  |         |                       |           |
|------------------|---------|-----------------------|-----------|
| ZINC000169289386 | 199.427 | Saralasin             | HY-P0205  |
| ZINC000085427689 | 199.095 |                       |           |
| ZINC000410428644 | 198.891 |                       |           |
| ZINC000085537068 | 198.243 | pralmorelin           |           |
| ZINC000169368439 | 197.945 |                       |           |
| ZINC000150340074 | 197.562 |                       |           |
| ZINC000150338703 | 197.404 | Carbetocin            | HY-17573  |
| ZINC000085537068 | 197.31  | pralmorelin           |           |
| ZINC000169368439 | 197.224 |                       |           |
| ZINC000085537068 | 196.842 | pralmorelin           |           |
| ZINC000150338506 | 196.629 | inositol niacinate    |           |
| ZINC000008214644 | 196.339 | pentagastrin          |           |
| ZINC000095564895 | 195.52  | Aripiprazole lauroxil | HY-108751 |
| ZINC000169289386 | 195.15  | Saralasin             | HY-P0205  |
| ZINC000195761836 | 194.839 |                       |           |
| ZINC000095617677 | 194.077 |                       |           |
| ZINC000169289386 | 193.911 | Saralasin             | HY-P0205  |
| ZINC000085574641 | 193.719 |                       |           |
| ZINC000169289386 | 193.706 | Saralasin             | HY-P0205  |
| ZINC000085537068 | 192.612 | pralmorelin           |           |
| ZINC000169368439 | 192.465 |                       |           |
| ZINC000169368439 | 191.83  |                       |           |
| ZINC000169289386 | 191.386 | Saralasin             | HY-P0205  |
| ZINC000085537068 | 191.103 | pralmorelin           |           |
| ZINC000261106252 | 190.497 |                       |           |
| ZINC000195761836 | 190.315 |                       |           |
| ZINC000085537068 | 190.165 | pralmorelin           |           |
| ZINC000169289386 | 190.057 | Saralasin             | HY-P0205  |
| ZINC000072131413 | 189.393 | hydroxy ritonavir     |           |
| ZINC000049918329 | 189.129 |                       |           |
| ZINC000008214644 | 188.903 | pentagastrin          |           |
| ZINC000169289386 | 188.35  | Saralasin             | HY-P0205  |
|                  |         | Glycerol              | HY-B2087  |
| ZINC000038945666 | 189.353 | phenylbutyrate        |           |

262

263

264

**Supplementary Table 8. Antibodies, probes and drugs. Antibodies**

| Antibody name               | Dilution                      | Cat NO.    | Manufacturer  |
|-----------------------------|-------------------------------|------------|---------------|
| RTN3 Polyclonal antibody    | 1:200 for IF<br>1:1000 for WB | 12055-2-AP | Proteintech   |
| Anti-TIMM44 antibody        | 1:200 for IF                  | HPA043052  | Sigma-Aldrich |
| anti-FLAG antibody          | 1:1000 for WB                 | 20543-1-AP | Proteintech   |
| His-Tag Monoclonal antibody | 1:1000 for WB                 | 66005-1-Ig | Proteintech   |
| Synaptogyrin-3 antibody     | 1:200 for IF                  | sc-271046  | Santa cruz    |

|                                                        |                   |            |                           |
|--------------------------------------------------------|-------------------|------------|---------------------------|
| Beta Actin Polyclonal antibody                         | 1:1000 for WB     | 20536-1-AP | Proteintech               |
| Doublecortin                                           | 1:200 for IF      | 4604s      | Cell Signaling Technology |
| Anti-Histone H3 (acetyl K27) antibody                  | 1:100 for CUT&Tag | ab4729     | Abcam                     |
| PPP2CA Polyclonal antibody                             | 1 : 1000 for WB   | 13482-1-AP | Proteintech               |
| PPP2R2C Polyclonal antibody                            | 1 : 1000 for WB   | 12747-1-AP | Proteintech               |
| PPP2R5A Polyclonal antibody                            | 1 : 1000 for WB   | 12675-2-AP | Proteintech               |
| PPP2R5E Polyclonal antibody                            | 1 : 1000 for WB   | 23885-1-AP | Proteintech               |
| Dnm11 Polyclonal antibody                              | 1 : 1000 for WB   | 12957-1-AP | Proteintech               |
| Anti-Synaptogyrin 1 antibody                           | 1 : 1000 for WB   | ab113886   | Abcam                     |
| SLC25A46 antibody                                      | 1 : 1000 for WB   | sc-515810  | Santa cruz                |
| RAB3B Monoclonal Antibody                              | 1 : 1000 for WB   | bsm-51316M | Bioss                     |
| Tau5 Monoclonal Antibody                               | 1 : 1000 for WB   | AHB0042    | Invitrogen                |
| Phospho-Tau (Ser202, Thr205) Monoclonal Antibody (AT8) | 1 : 1000 for WB   | MN1020     | Invitrogen                |
| Tau (Phospho-Ser396) Antibody                          | 1 : 1000 for WB   | #11102     | Signalway                 |
| Solar Fluor 488                                        | 1:200 for IF      | #S1063     | Solarbio                  |

265 IF, immunofluorescence; WB, Western Blot.

266

267 Probes

| miRNA   | Sequence 5'-3'        |
|---------|-----------------------|
| miR-124 | GGCATTACCGCGTGCCTTA   |
| miR-218 | ACATGGTTAGATCAAGCACAA |

268

269 Drugs

| Drug name  | Concentration                               | Cat NO.  | Manufacturer   |
|------------|---------------------------------------------|----------|----------------|
| Senktide   | 5 $\mu$ m in vitro<br>0.4 mg/kg <i>s.c.</i> | HY-P0187 | MedChemExpress |
| Saralasin  | 5 $\mu$ m in vitro                          | HY-P0205 | MedChemExpress |
| Carbetocin | 10 $\mu$ m in vitro                         | HY-17573 | MedChemExpress |

|                            |                       |                     |                |
|----------------------------|-----------------------|---------------------|----------------|
| Glycerol<br>phenylbutyrate | 10 µm in vitro        | HY-B2087            | MedChemExpress |
| Aripiprazole lauroxil      | 10 µm in vitro        | HY-108751           | MedChemExpress |
| YF-2                       | 20 mg/kg <i>i.p.</i>  | HY-16531            | MedChemExpress |
| SAHA                       | 50 mg/kg <i>i.p.</i>  | HY-10221            | MedChemExpress |
| miR-218-5p agomir          | 0.5 µL 200 µM in vivo | miR40000663-4-5     | RIBOBIO        |
| miR-218-5p mimic           | 200 nM in vitro       | miR10000663-1-5     | RIBOBIO        |
| miR-218-5p<br>antagomir    | 200 nM in vitro       | miR312919151936-4-5 | RIBOBIO        |
| miR-124-3p mimic           | 100 nM in vitro       | miR10000134-1-5     | RIBOBIO        |
| miR-124-3p agomir          | 0.5 µL 100 µM in vivo | miR40000134-4-5     | RIBOBIO        |
| miR-124-3p<br>antagomir    | 100 nM in vitro       | miR30000134-4-5     | RIBOBIO        |

270

271

## Plasmids and viruses

|                                       |            |             |
|---------------------------------------|------------|-------------|
| pEGFP-C1                              | Clontech   | 6084-1      |
| pEGFP-C1- P301L                       | This lab   | NA          |
| pCDNA3.1(+)- <i>Rtn3</i> -6×His       | This paper | NA          |
| pCDNA3.1(+)- <i>Dnm1l</i> -3×FLAG     | This paper | NA          |
| pCDNA3.1(+)- <i>Syng1</i> -3×FLAG     | This paper | NA          |
| pCDNA3.1(+)- <i>Rab3b</i> -3×FLAG     | This paper | NA          |
| pCDNA3.1(+)- <i>Slc25a46</i> -3×FLAG  | This paper | NA          |
| pCDNA3.1(+)- <i>Rtn3</i> -3*A/L-6×His | This paper | NA          |
| pCDNA3.1(+)- <i>Rtn3</i> -5*A -6×His  | This paper | NA          |
| pCDNA3.1(+)- <i>Rtn3</i> -6*A -6×His  | This paper | NA          |
| pCDNA3.1(+)- <i>Rtn3</i> -7*A -6×His  | This paper | NA          |
| pCDNA3.1(+)- <i>Rtn3</i> -17*A -6×His | This paper | NA          |
| psiCheck2.0- <i>Rtn3</i> 3'UTR        | This paper | NA          |
| psiCheck2.0- <i>Rtn3</i> Mut1         | This paper | NA          |
| psiCheck2.0- <i>Rtn3</i> Mut2         | This paper | NA          |
| psiCheck2.0- <i>Rtn3</i> Mut3         | This paper | NA          |
| AAV-hSYN-miR-218 & 124 decoys         | Obio       | Custom made |
| AAV-Hsyn- <i>Rtn3</i> shRNA           | Obio       | Custom made |

272

273

274

**Supplementary Table 9. primers used for qPCR and plasmid construction**

| qPCR primer    | 5'-3'                  |
|----------------|------------------------|
| <i>Rtn3</i> F  | CTGGCAGCCTTCAGTGTTATC  |
| <i>Rtn3</i> R  | ATCGCAGCATTTCATGTAGTTG |
| <i>Sirt2</i> F | CCTGATATCGTGTTCG       |
| <i>Sirt2</i> R | CTTGTTAATGAGCAGCCGTG   |
| <i>Hdac1</i> F | GCACCAAGAGGAAAGTCTGT   |
| <i>Hdac1</i> R | TATTATCTGGCGAATAGAA    |

|                 |                         |
|-----------------|-------------------------|
| <i>Hdac7</i> F  | CAGGATCGGCTCAAACCTCA    |
| <i>Hdac7</i> R  | GGCCATCATTGCCATAGGT     |
| <i>Hdac8</i> F  | ACGGGAAGTGTAAGTAGCC     |
| <i>Hdac8</i> R  | TCGATGTAAACTGAAGGCA     |
| <i>Sirt6</i> F  | GAATGCTCGGCCCTCGAAGA    |
| <i>Sirt6</i> R  | GGTGCCCAACCGTGTCTC      |
| <i>Hdac3</i> F  | AGAGAGTGGCCGCTACTATT    |
| <i>Hdac3</i> R  | TTCCCCATGTCTCGAATGC     |
| <i>Hdac6</i> F  | CCAGCCTCGCATAAAACAA     |
| <i>Hdac6</i> R  | AAGTCAGACACCCAGTTC      |
| <i>Sirt1</i> F  | ACACCTCTTCATATTCGGA     |
| <i>Sirt1</i> R  | TTCTTGTGGTTTTTCTTCCA    |
| <i>Hdac10</i> F | GTCAGATAAGGAAGGAAAAC    |
| <i>Hdac10</i> R | ATGTAGATGAGGCAAAGGTT    |
| <i>Hdac4</i> F  | AGTTCTCACTGCCCTTGAA     |
| <i>Hdac4</i> R  | GGGAGCTGTGCTGTGTCTTC    |
| <i>Sirt3</i> F  | GGCACTACAGGCCCAATGTC    |
| <i>Sirt3</i> R  | GCTGCTCCCCAAAGAACACA    |
| <i>Sirt5</i> F  | CCAGTTGTGTTGTAGACGAA    |
| <i>Sirt5</i> R  | AGTTTTAAATAAGGTTCCGT    |
| <i>Hdac11</i> F | CCGGTCATCTTTCTCCCAA     |
| <i>Hdac11</i> R | AGTCTCGCTCATGCCATTG     |
| <i>Hdac5</i> F  | CGCTACGACAACGGGAACCT    |
| <i>Hdac5</i> R  | CTGGGCTTTTGCTGCAAGAC    |
| <i>Hdac9</i> F  | AGCCCATCTCACCTTTAGAC    |
| <i>Hdac9</i> R  | GCTTGCCACTGCCCTTCTC     |
| <i>Sirt7</i> F  | CTTTGGGGAGAGGGGGACAT    |
| <i>Sirt7</i> R  | GTTGGTGGGAGCGGTTGTAG    |
| <i>EP300</i> F  | AATGGGGAAGTGAGGCAGTG    |
| <i>EP300</i> R  | TGGGGTTGTGGTGAATCTG     |
| <i>Crebbp</i> F | AACCAAAACGACTACAGGAG    |
| <i>Crebbp</i> R | TGAATCACAAGAATACCTC     |
| <i>Sirt4</i> F  | ACTCCTCGTGATGACAGGCG    |
| <i>Sirt4</i> R  | CCCACAAAGTTTCGGGCCCA    |
| <i>Hdac2</i> F  | CAGTTGCCCTTGATTGTGAA    |
| <i>Hdac2</i> R  | CTCCTTTGGGGTCTGTTTTC    |
| <i>Hat1</i> F   | ATCTTGAGAATGACATTAGA    |
| <i>Hat1</i> R   | GAACAGTGTTGACAGGCTAC    |
| miR-218-5p      | TTGTGCTTGATCTAACCATGT   |
| miR-124-3p      | TAAGGCACGCGGTGAATGCC    |
| miR-210-3p      | CTGTGCGTGTGACAGCGGCTGA  |
| miR-185-5p      | TGGAGAGAAAGGCAGTTCCTGA  |
| miR-15a-5p      | TAGCAGCACATAATGGTTTTGTG |
| miR-539-5p      | GGAGAAATTATCCTTGGTGTGT  |

|                |                           |
|----------------|---------------------------|
| miR-335-3p     | TTTTTCATTATTGCTCCTGACC    |
| miR-29a-3p     | TAGCACCATCTGAAATCGGTTA    |
| miR-15b-5p     | TAGCAGCACATCATGGTTTACA    |
| miR-138-5p     | AGCTGGTGTGTGAATCAGGCCG    |
| miR-16-5p      | TAGCAGCACGTAAATATTGGCG    |
| miR-23b-3p     | ATCACATTGCCAGGGATTACC     |
| miR-23a-3p     | ATCACATTGCCAGGGATTTC      |
| miR-139-5p     | TCTACAGTGCACGTGTCTCCAG    |
| miR-107-3p     | AGCAGCATTGTACAGGGCTATCA   |
| miR-222-3p     | AGCTACATCTGGCTACTGGGTCT   |
| miR-221-3p     | AGCTACATTGTCTGCTGGGTTTC   |
| miR-103-3p     | AGCAGCATTGTACAGGGCTATGA   |
| let-7e-5p      | TGAGGTAGGAGGTTGTATAGTT    |
| miR-342-3p     | TCTCACACAGAAATCGCACCCGT   |
| let-7b-5p      | TGAGGTAGTAGGTTGTGTGGTT    |
| miR-24-3p      | TGGCTCAGTTCAGCAGGAACAG    |
| miR-125b-5p    | TCCCTGAGACCCTAACTTGTGA    |
| miR-125a-5p    | TCCCTGAGACCCTTAACTTGTGA   |
| miR-191-5p     | CAACGGAATCCCAAAGCAGCTG    |
| miR-26a-5p     | TTCAAGTAATCCAGGATAGGCT    |
| miR-127-3p     | TCGGATCCGTCTGAGCTTGGCT    |
| miR-132-5p     | AACCGTGGCTTTCGATTGTTAC    |
| miR-181a-5p    | AACATTCAACGCTGTCGGTGAGT   |
| miR-151-3p     | CTAGACTGAGGCTCCTTGAGG     |
| miR-361-3p     | TCCCCCAGGTGTGATTCTGATTTGT |
| miR-99b-5p     | CACCCGTAGAACCGACCTTGCG    |
| let-7c-5p      | TGAGGTAGTAGGTTGTATGGTT    |
| miR-128-3p     | TCACAGTGAACCGGTCTCTTT     |
| let-7d-5p      | AGAGGTAGTAGGTTGCATAGTT    |
| let-7a-5p      | TGAGGTAGTAGGTTGTATAGTT    |
| miR-27a-3p     | TTCACAGTGGCTAAGTTCCGC     |
| miR-187-3p     | TCGTGTCTTGTGTTGCAGCCGG    |
| miR-194-5p     | TGTAACAGCAACTCCATGTGGA    |
| pre-miR-218 F  | TGCTTGCGAGGTATGAGAAA      |
| pre-miR-218 R  | TAGAAAGCTGCGTGACGTTC      |
| pre-miR-124 F  | CTCTCTCTCCGTGTTACAG       |
| pre-miR-124 R  | GCCTTAATTGTATGGACATT      |
| <i>Slit2</i> F | CTTCGGGTAGATGCTTTTCA      |
| <i>Slit2</i> R | AATCCGCTAGCCACTTGAGA      |
| <i>Slit3</i> F | AATAGGATCAAGGAAGTGCG      |
| <i>Slit3</i> R | TTGTCATAGAGAGACAGCAG      |
| miR124-2hg F   | ACAAACCGAAGGACCTGACCA     |
| miR124-2hg R   | GGCTCTTTTACAGCATCCCTT     |
| Mir124a-1hg F  | GATTGGAGAGATCAACGCTG      |

|                    |                        |
|--------------------|------------------------|
| Mir124a-1hg R      | GACAATGAGATAACAGCCACGT |
| Universal R Primer | GCTGTCAACGATACGCTACG   |
| U6 for             | GATGACACGCAAATTCGTGAA  |
| <i>Gapdh</i> for   | TGTTTCCTCGTCCCGTAG     |
| <i>Gapdh</i> rev   | CAATCTCCACTTTGCCACT    |
| hsa-miR-124        | TAAGGCACGCGGTGAATGCC   |
| hsa-miR-218        | TTGTGCTTGATCTAACCATGT  |

| primer for plasmid construction | 5'-3'                                  |
|---------------------------------|----------------------------------------|
| <i>Rtn3</i> F                   | TGAGTCAGTCAGTCTGTCCGA                  |
| <i>Rtn3</i> R                   | TCCTTCATAGTACAAGTGATGATG               |
| <i>Slc25a46</i> F               | GTGACTTCCGGTTGTCAGTCT                  |
| <i>Slc25a46</i> R               | AACACAGTGACCTGAATCCAAG                 |
| <i>Rab3b</i> F                  | CTGCCTCTCACCCACTATCG                   |
| <i>Rab3b</i> R                  | GGGAATGGACAGTAATGGAGA                  |
| <i>Syng1</i> F                  | ACGATGGAAGGGGGTGCCTA                   |
| <i>Syng1</i> R                  | GTGGCAGAGCAGCAGAGGAAG                  |
| <i>Dnm11</i> F                  | CGGAGGAGAAGAGGAAGCAAG                  |
| <i>Dnm11</i> R                  | AGGCAGCAGCAGGTTCAAGTC                  |
| <i>Rtn3</i> F for miR-218       | GCATCAGTTACTAAAACACCATT                |
| <i>Rtn3</i> R for miR-218       | GATTCAATCTTTATTCTTTACGG                |
| <i>Rtn3</i> F for miR-124       | AAATAGTATGGGGCAAGAGTG                  |
| <i>Rtn3</i> R for miR-124       | GCATTCTGGGAGTTCTGTAAG                  |
| <i>Rtn3</i> F-1 for miR-124     | TTTCAAGGTATTTGATGGTCAC                 |
| <i>Rtn3</i> R-1 for miR-124     | TGTTAGGAGACCCCATAGACC                  |
| <i>Rtn3</i> -3*A/L R            | AGCGCATAGTGCAGCAGCCCCGCCGCCGCCGAGAGCT  |
| <i>Rtn3</i> -3*A/L F            | TGCTGCACTATGCGCTGCCCTGGGGCGAAGAGCTGC   |
| <i>Rtn3</i> 5*A R-1             | GAGCCGCATGCCTTCGCCCCAGGGCGGGGCAGGCT    |
| <i>Rtn3</i> 5*A F-1             | GAAGGCATGCGGCTCCTCGTGTGCGGTGCACGATCT   |
| <i>Rtn3</i> 5*A R-2             | TGCCACATCTCGAGCGAAAATCAGATCGTGACCCGCA  |
| <i>Rtn3</i> 5*A F-2             | GCTCGAGATGTGGCAAAGACTGGGTTTGTCTTTGGCA  |
| <i>Rtn3</i> 6*A R-1             | TGCGGCAAAGACAGCCCCAGTCTTCTTACATCTC     |
| <i>Rtn3</i> 6*A F-1             | GCTGTCTTTGCCGCAACACTGATCATGCTGCTCTC    |
| <i>Rtn3</i> 6*A R-2             | CAGCATTGCCAGTGTGGTGCCAAAGACA           |
| <i>Rtn3</i> 6*A F-2             | ACACTGGCAATGCTGCTCTCTCTGGCAGC          |
| <i>Rtn3</i> 7*A R               | AGCGGCTGCCAGAGCAGCCAGCATGATCAGTGTGGTGC |
| <i>Rtn3</i> 7*A F               | GCTGCTCTGGCAGCCGCTAGTGTATCAGTGTGGTCTC  |
| <i>Rtn3</i> 17*A R              | TCAGAGCCATAGCGACAGCCAGCTTCAAGGAGT      |
| <i>Rtn3</i> 17*A F              | TCGCTATGGCTCTGATGACCTATGTTGGTGC        |

Open Field Test

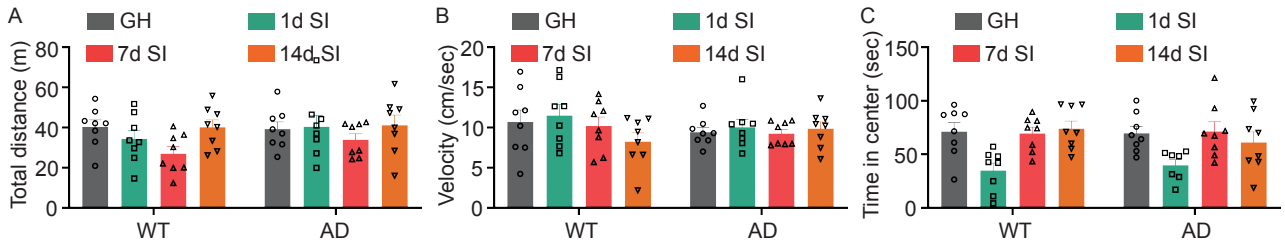

Elevated Plus Test

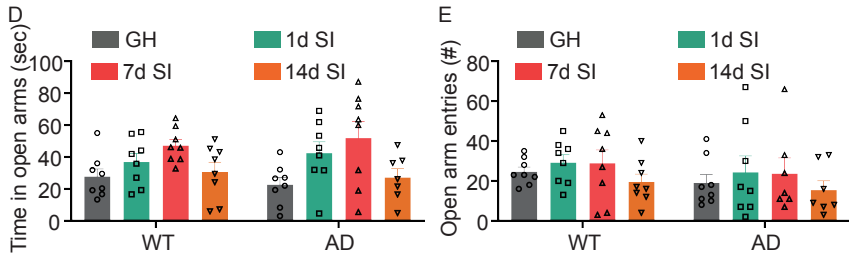

Morris Water Maze

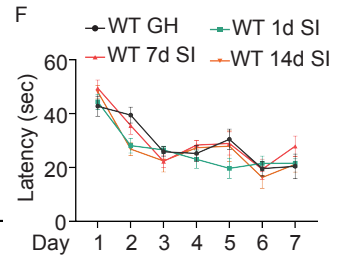

Morris Water Maze

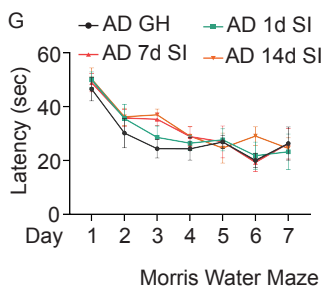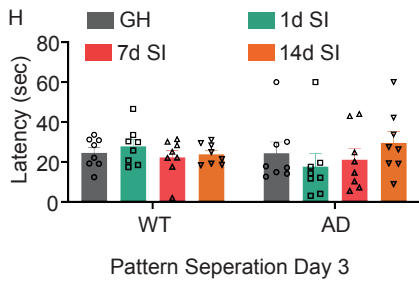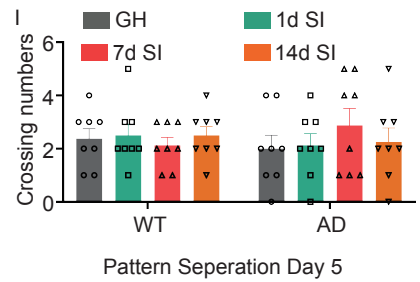

Morris Water Maze

Pattern Separation Day 3

Pattern Separation Day 5

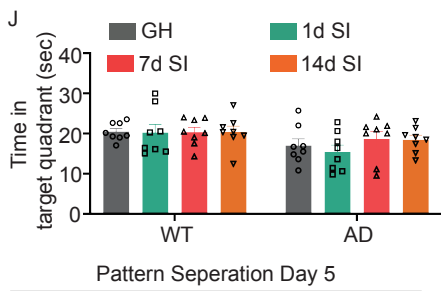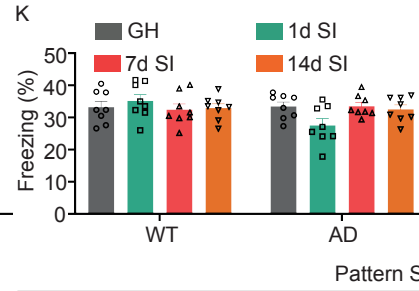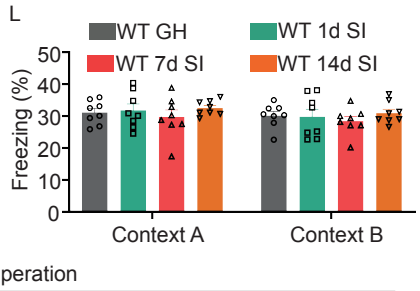

Pattern Separation Day 5

Pattern Separation

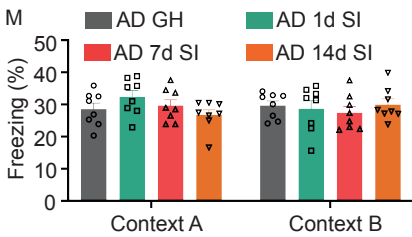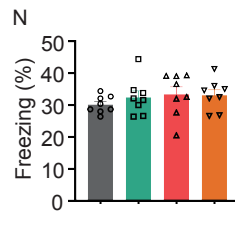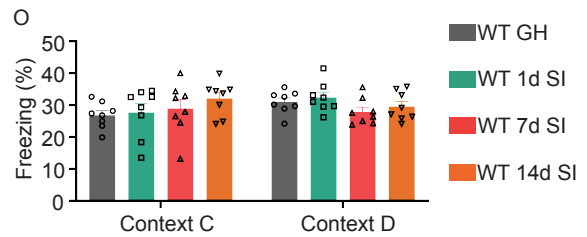

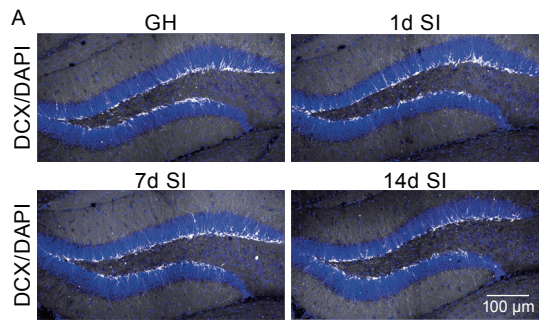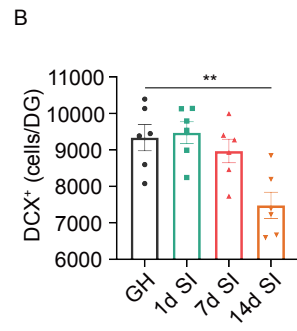



A

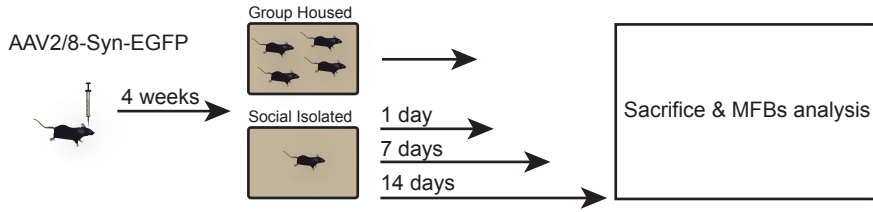

B

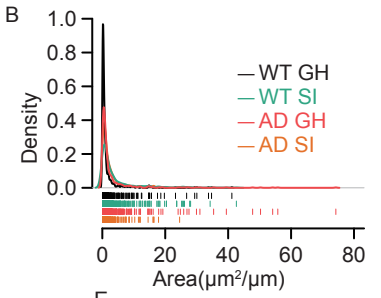

C

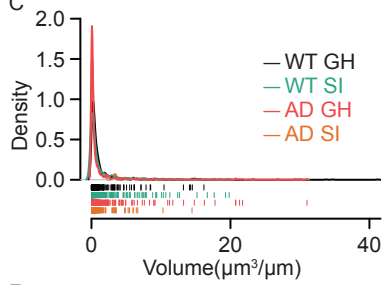

D

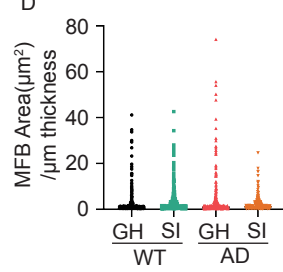

E

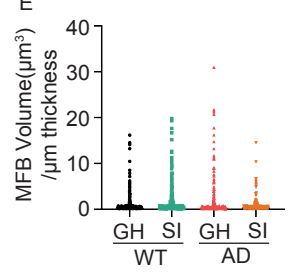

F

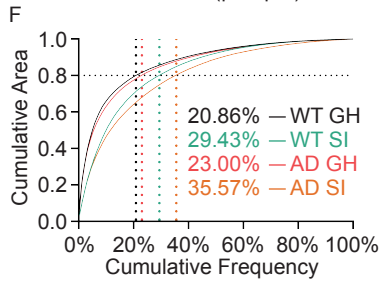

G

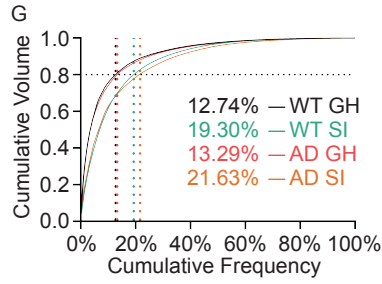

H

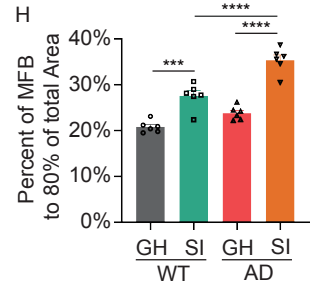

I

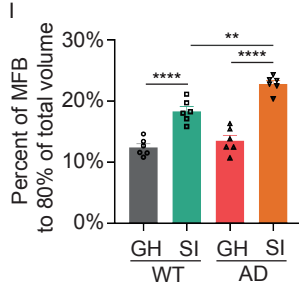

J

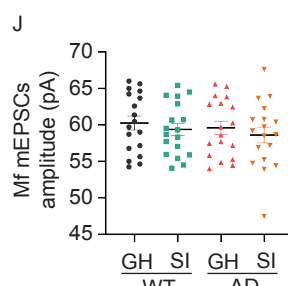

K

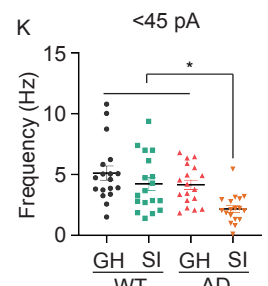

L

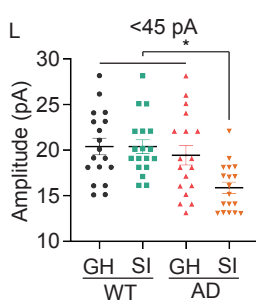

M

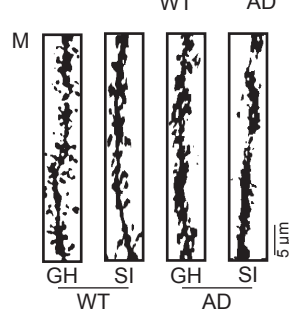

N

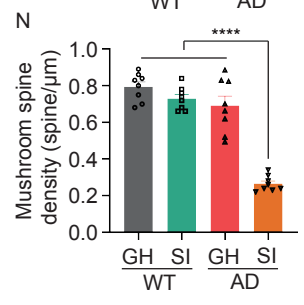

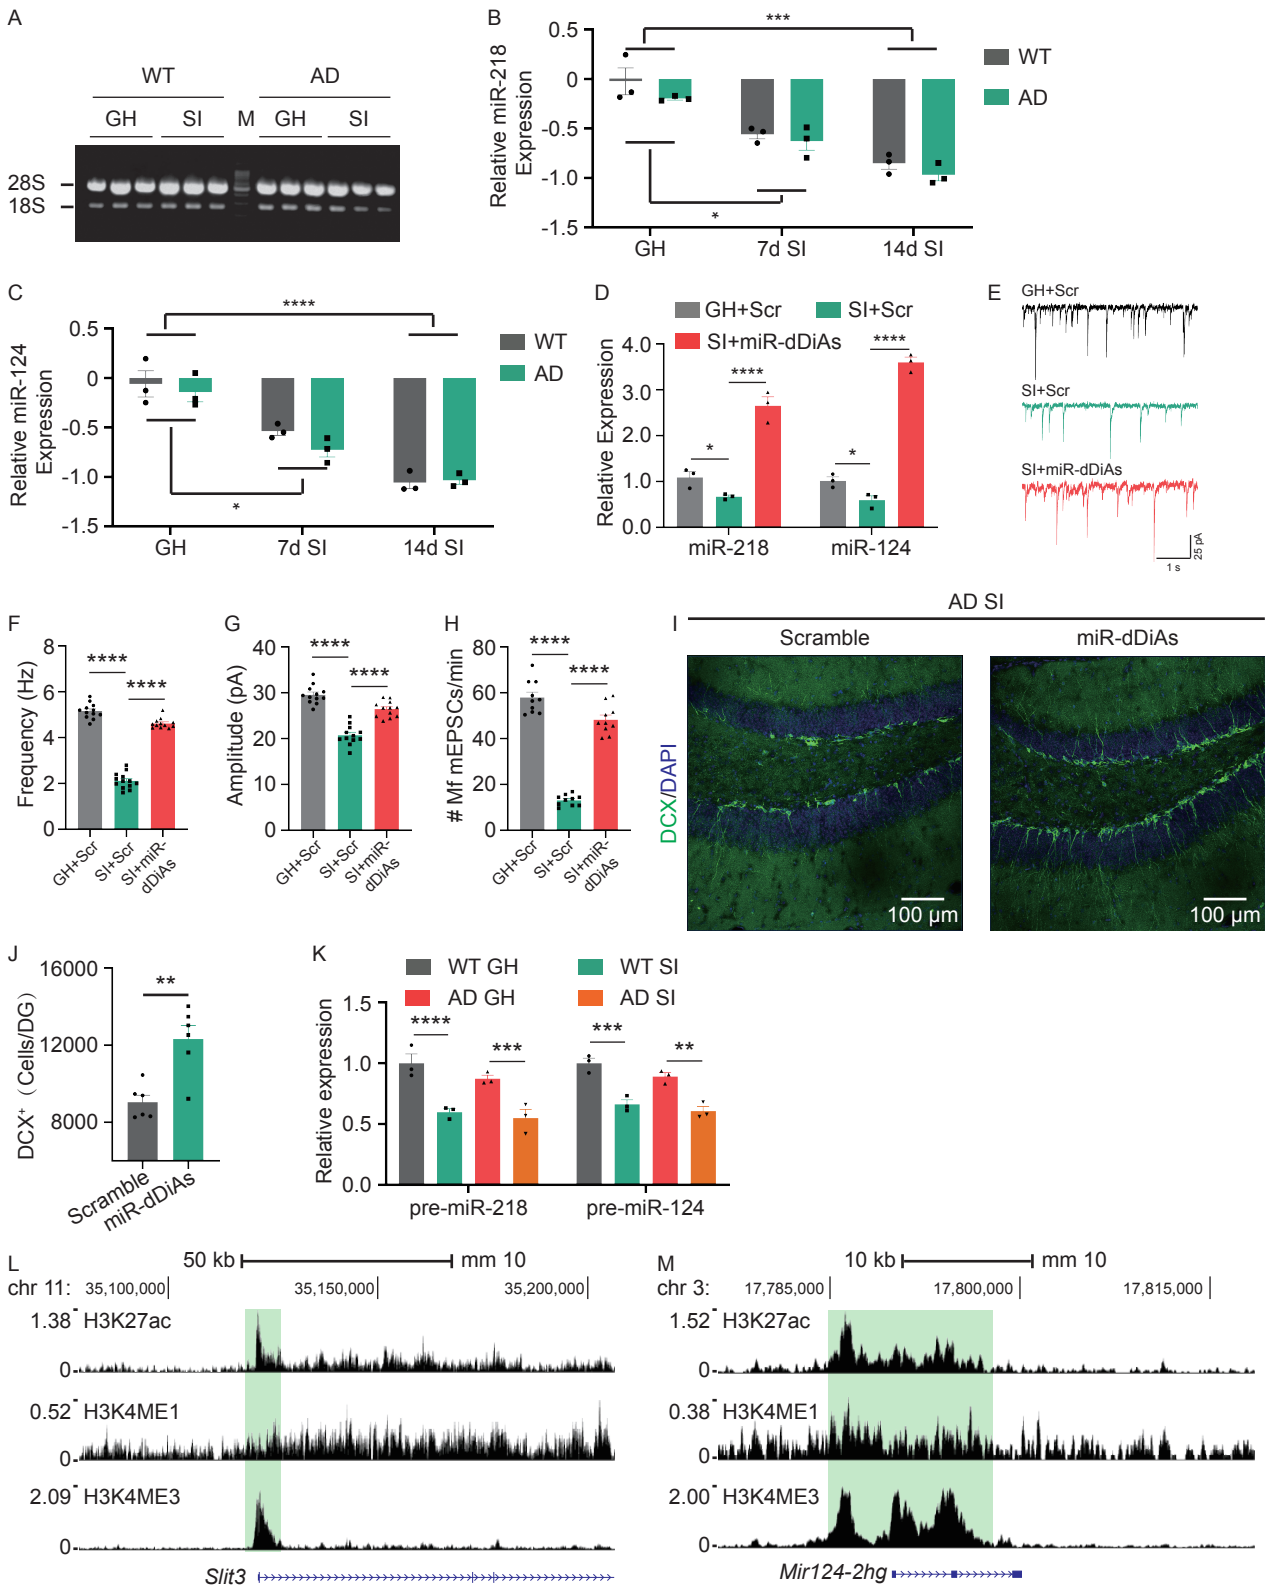

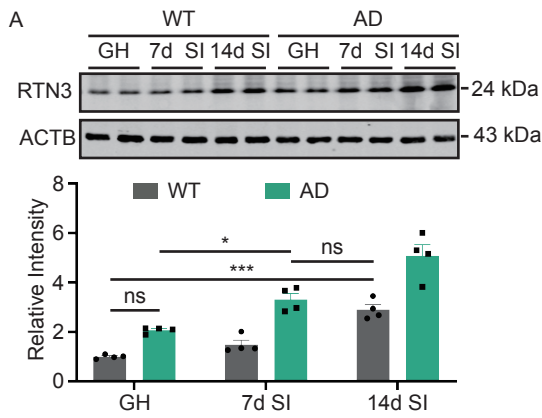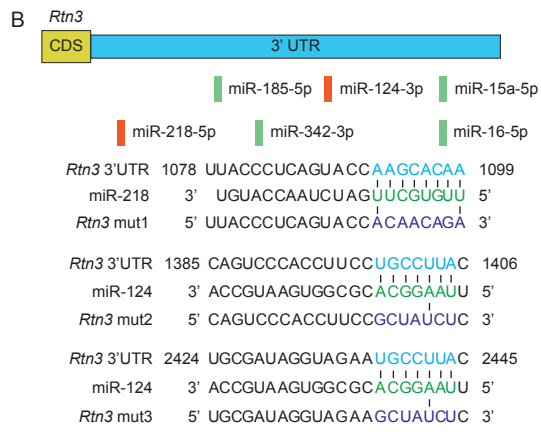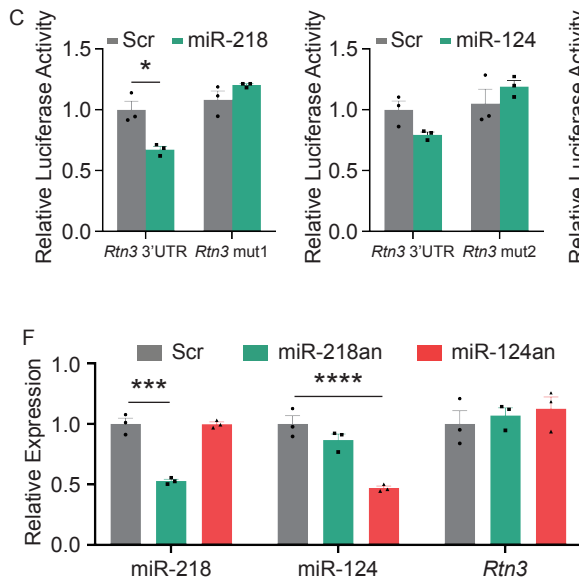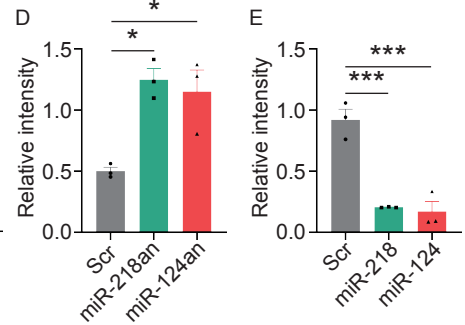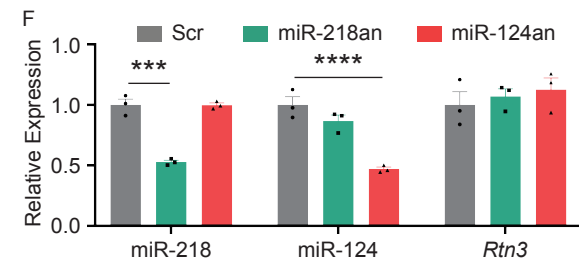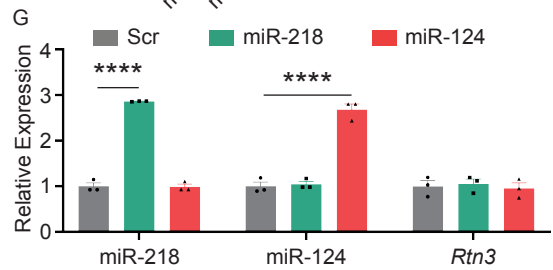

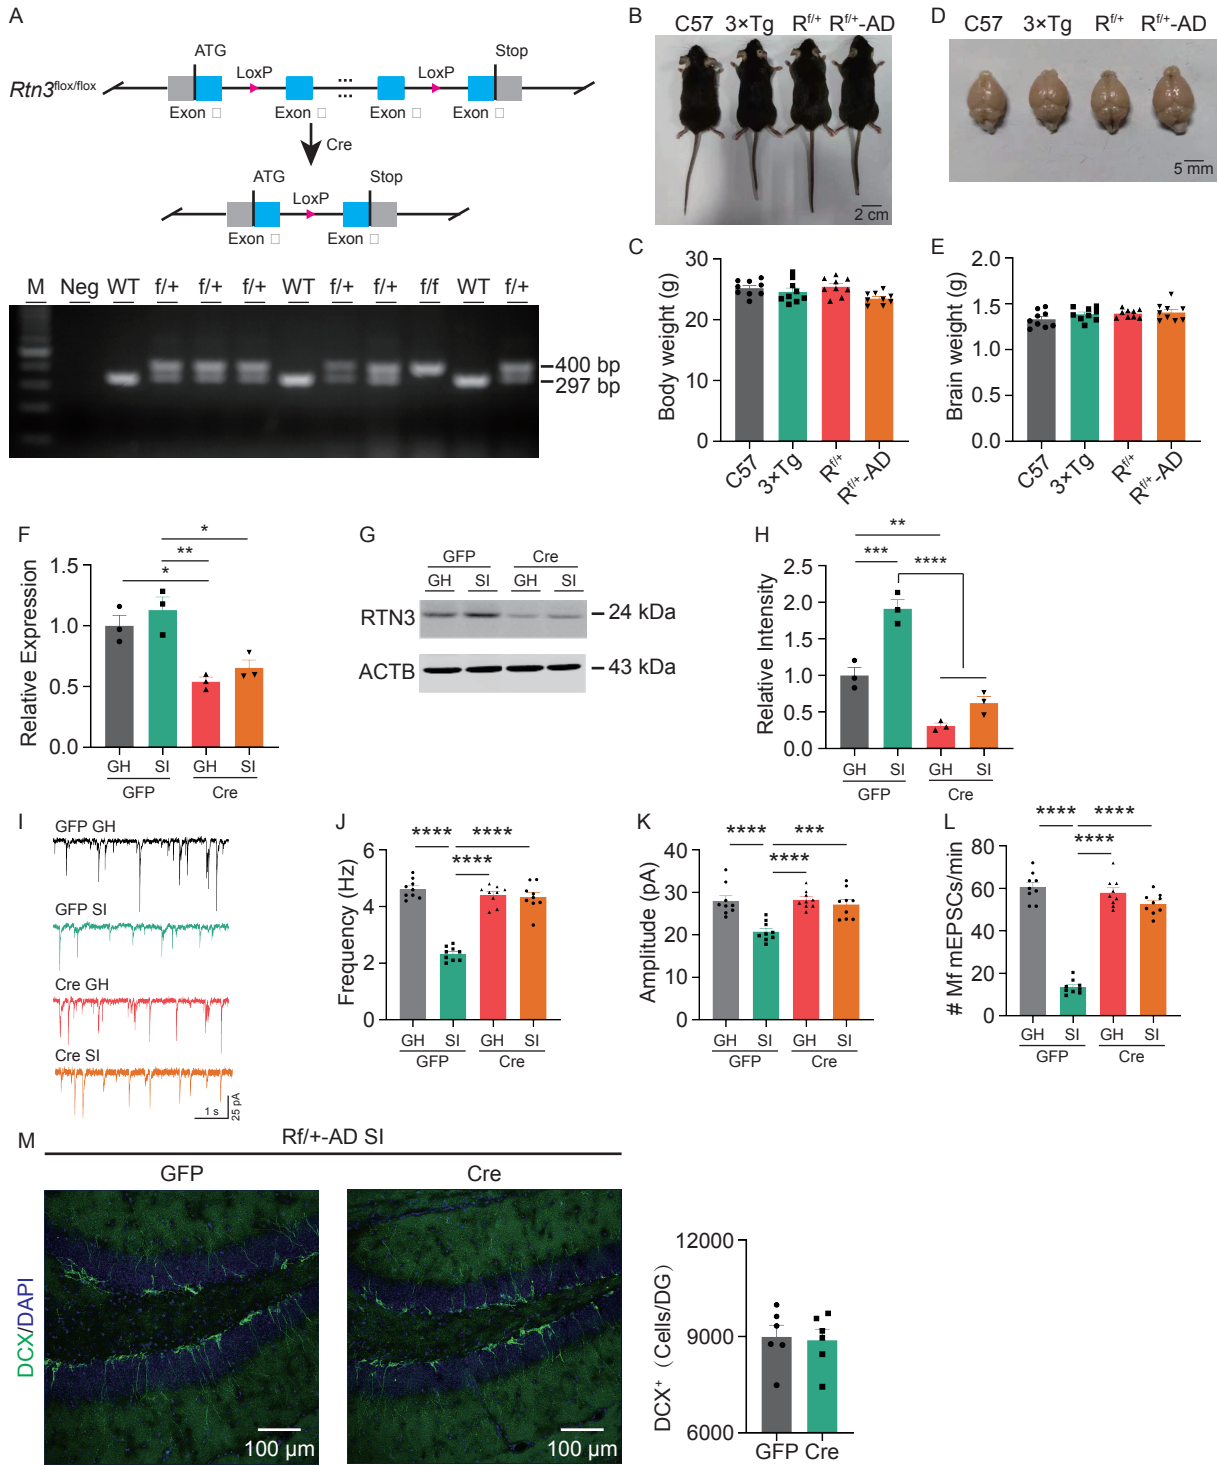

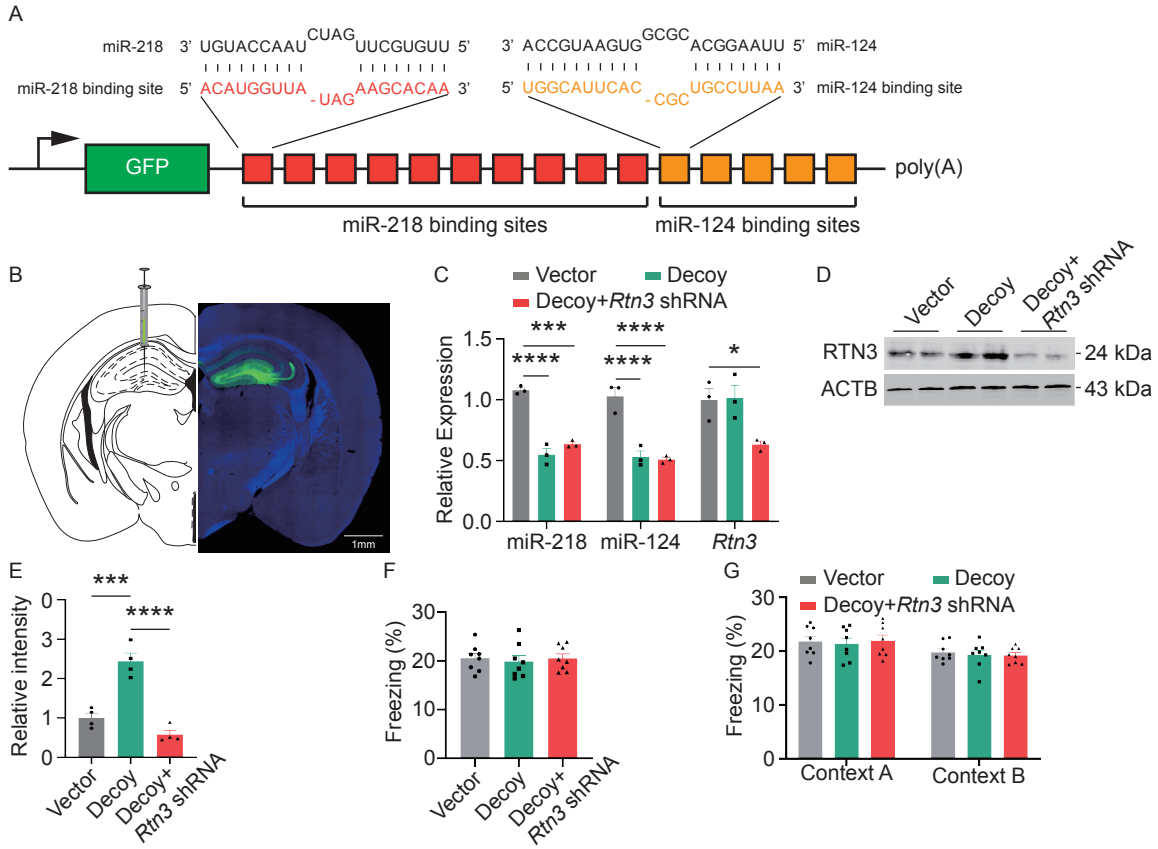

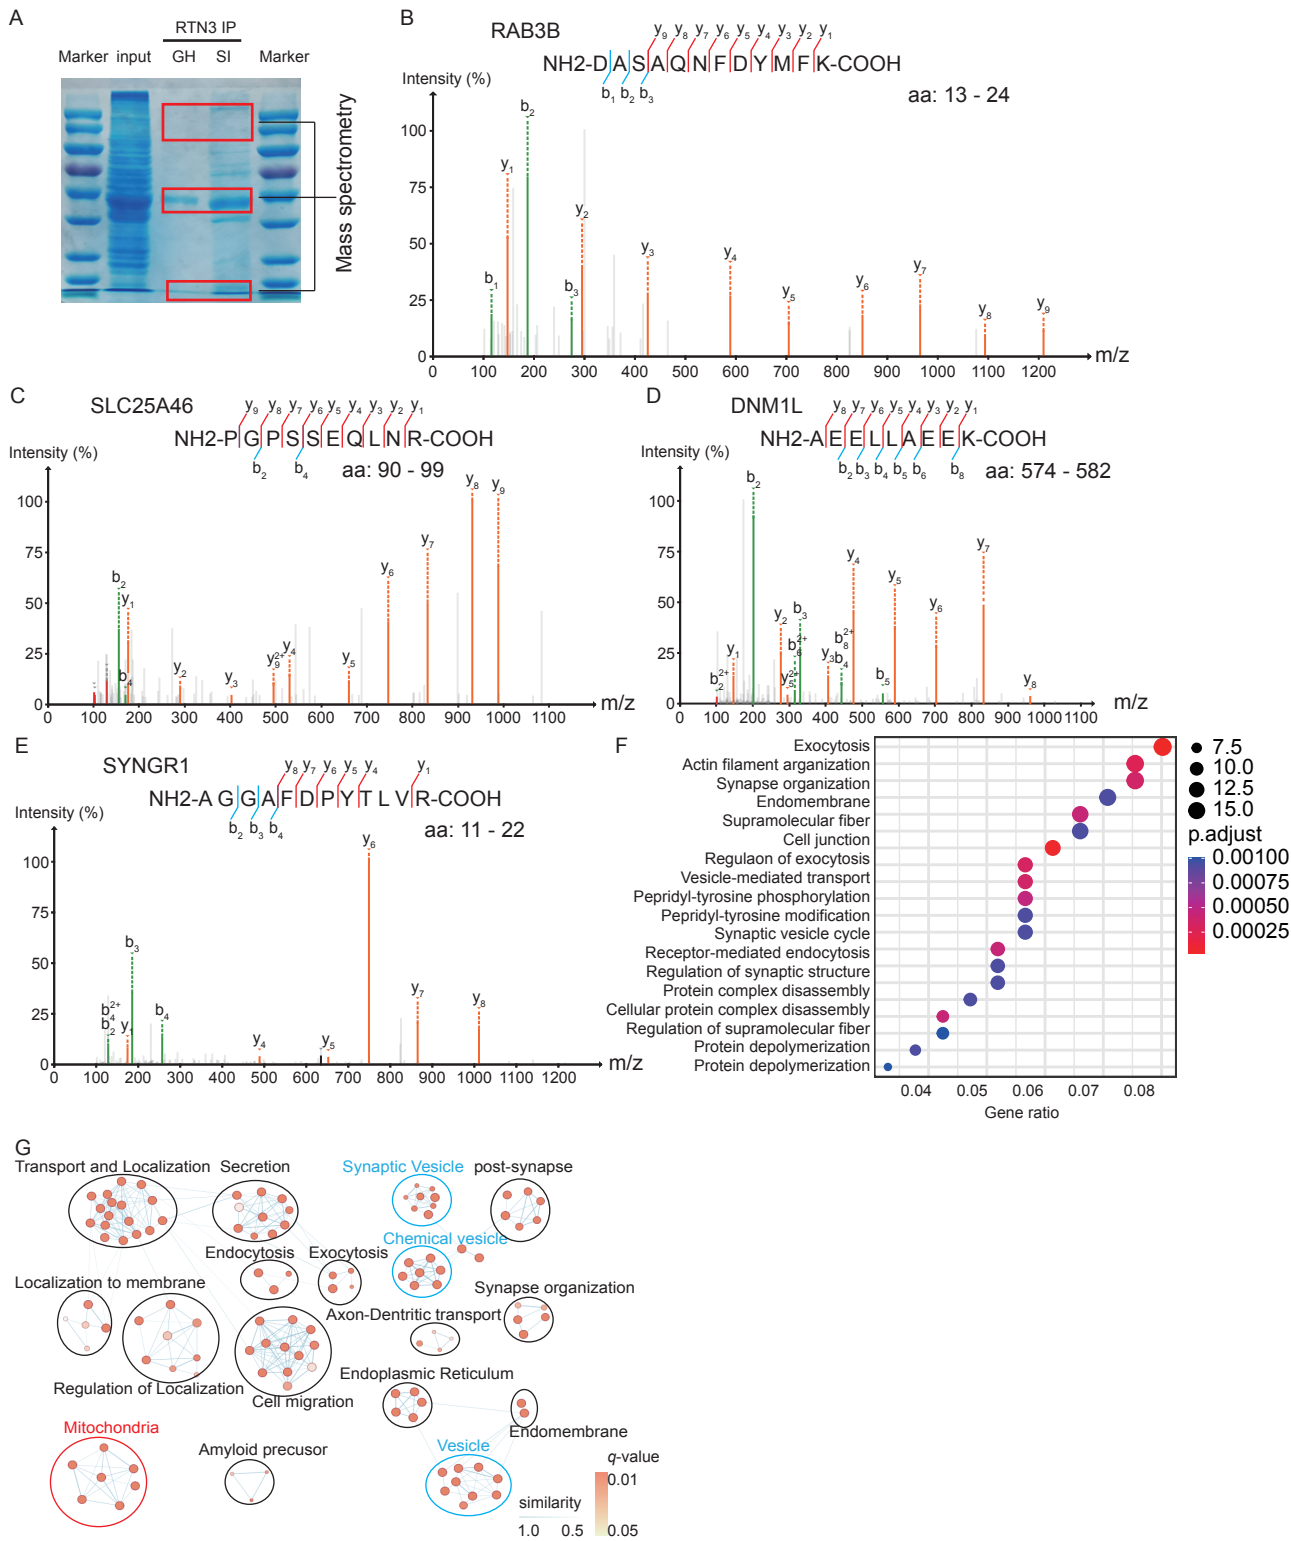

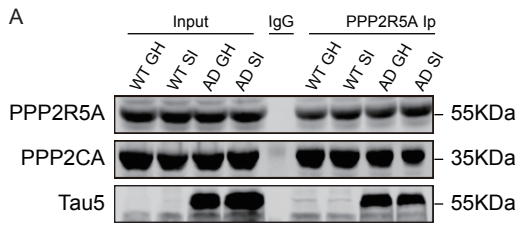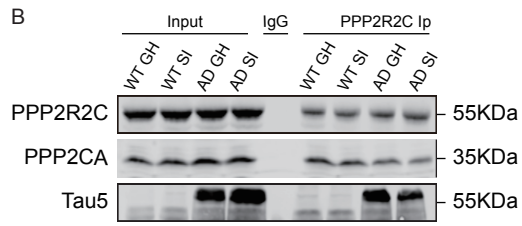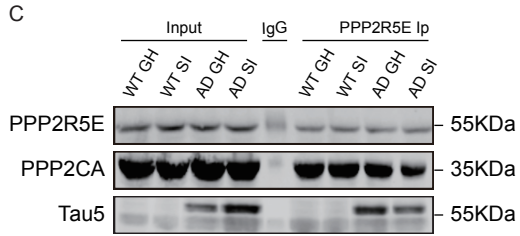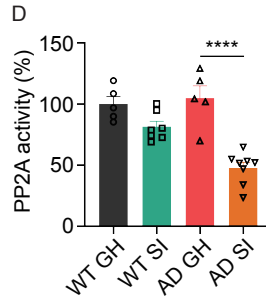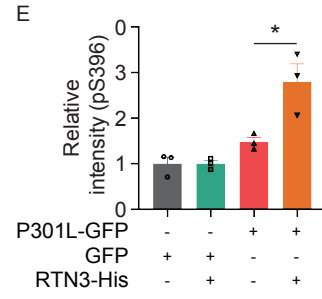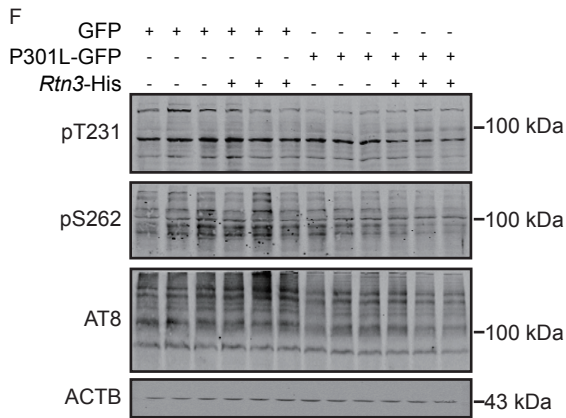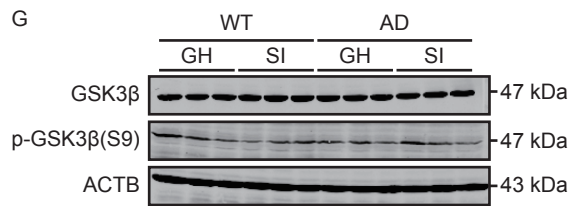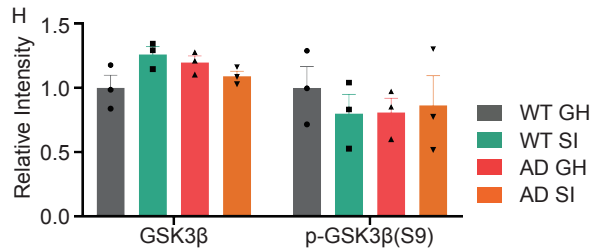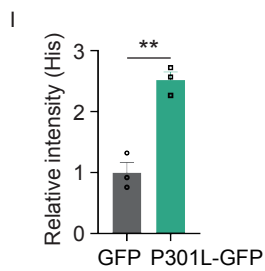

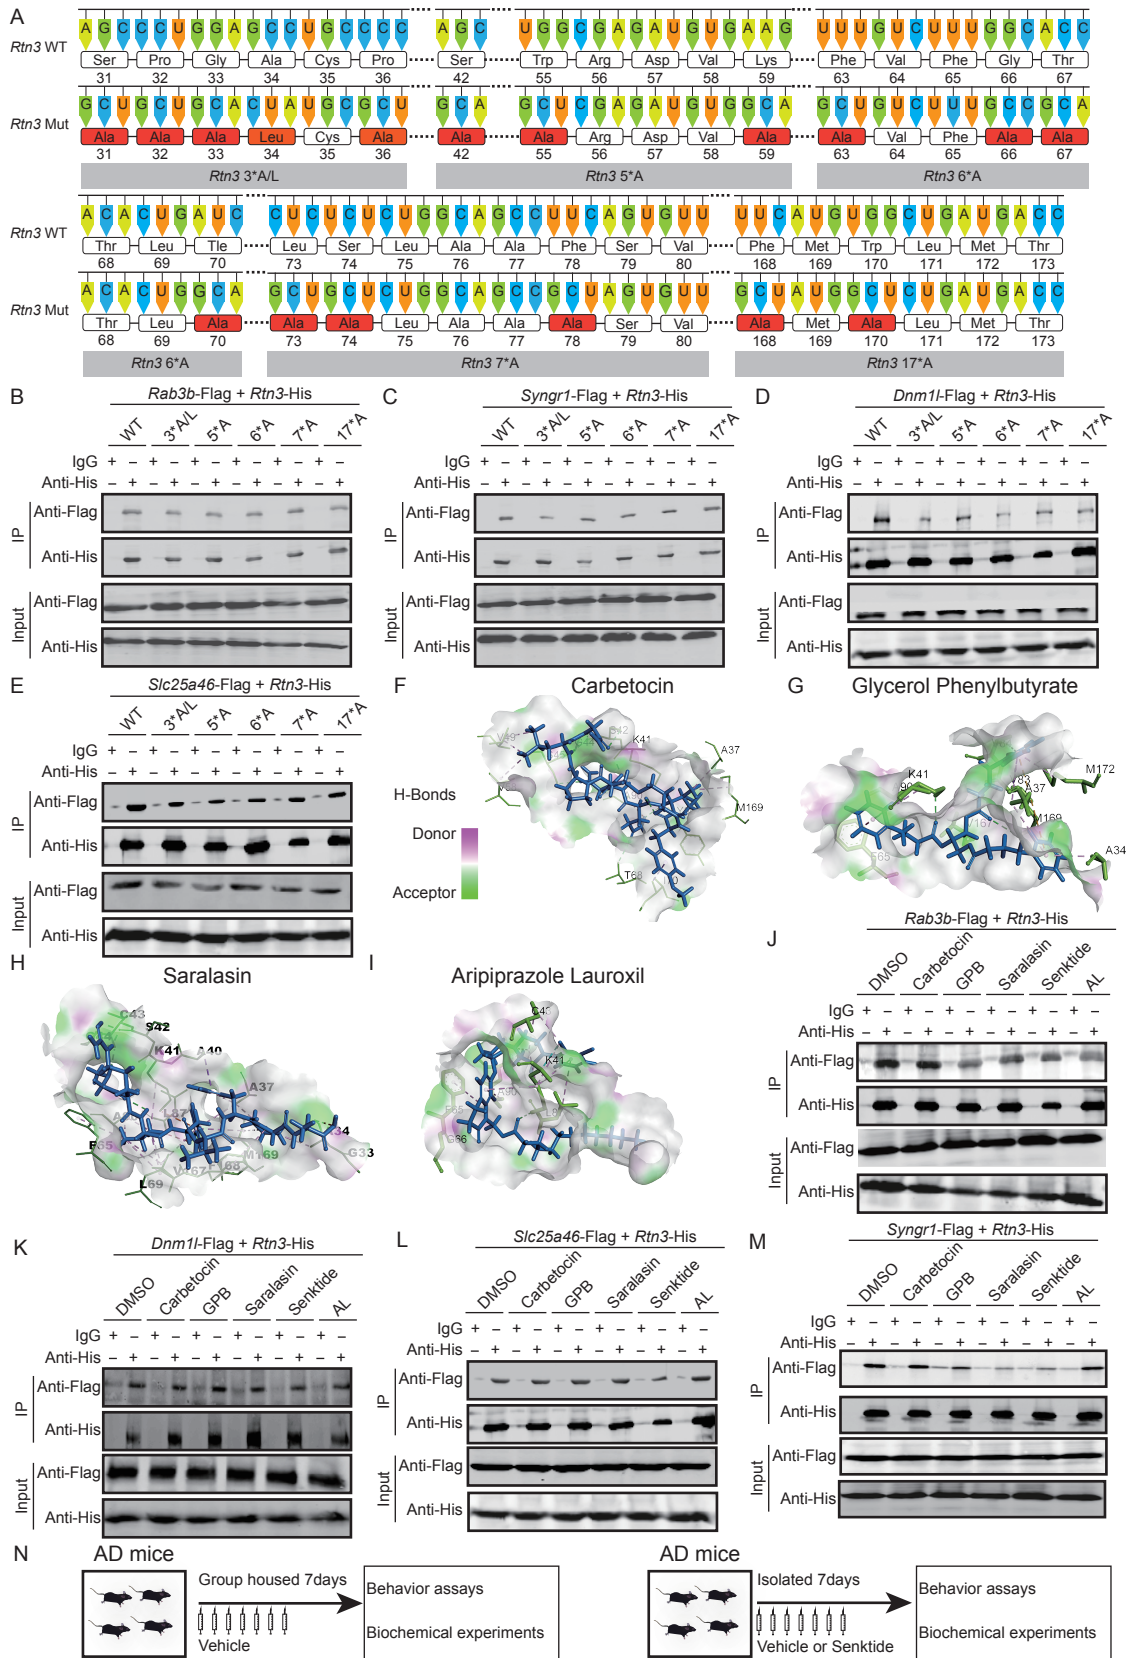



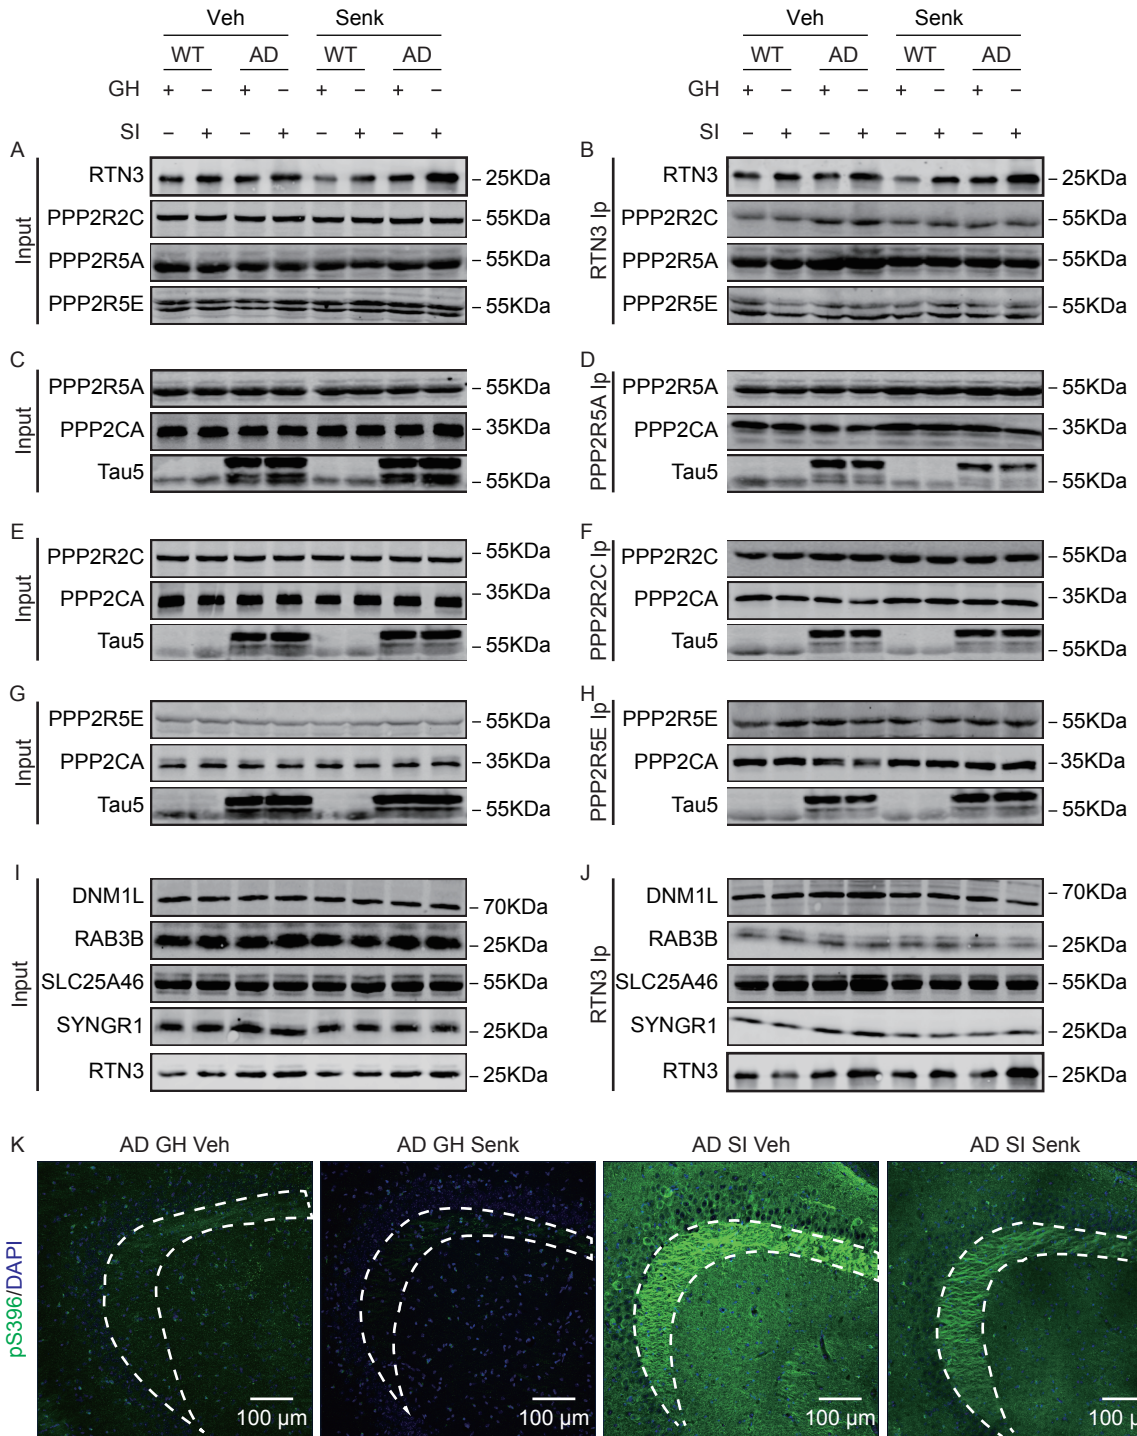

Supplement: pwad056_suppl_supplementary_figures_1-11_tables_s1-s2-s7-s9.pdf [file pwad056_suppl_supplementary_figures_1-11_tables_s1-s2-s7-s9.pdf]
